---

Corrigendum

# High-complexity regions in mammalian genomes are enriched for developmental genes

Anton Pirogov, Peter Pfaffelhuber, Angelika Börsch-Haubold and Bernhard Haubold

*Bioinformatics* (2019) doi:<http://dx.doi.org/10.1093/bioinformatics/bty922>

In the originally published version of this manuscript, there was an error in the 'Availability and implementation' section of the Abstract.

The URL for the browser tracks should be: [guanine.evolbio.mpg.de/complexity](http://guanine.evolbio.mpg.de/complexity)

This detail has been corrected only in this corrigendum to preserve the published version of record.
